# Supplementary material
Source: ML conference proceedings conference paper supplement (https://aclanthology.org/2024.inlg-main.7)
Supplement: Supplementary_Attachment [file 2024.inlg-main.7.Supplementary_Attachment.pdf]

## A Training Algorithm

---

**Algorithm 1** Simplified description of the training algorithm.

---

```
Load 4-bit Quantized Base Model
Load Training Hierarchy
for Level in Training Hierarchy do
  for Group in Level do
    Load data of all languages in Group
    if Level not 0 then
      Load relevant LoRAs from previous Levels
      Merge LoRAs with model
    end if
    Add new LoRA
    Train LoRA on relevant data
    Save current Group LoRA
  end for
end for
```

---

## B Training Hyper Parameters

Table 5 shows all the hyperparameters used while training PTHQL.

| Hyperparameter                | Value              |
|-------------------------------|--------------------|
| Dataset                       | AMR3.0 + Flores200 |
| Max sequence length           | 256 tokens         |
| Batch Size                    | 8                  |
| Unique Instances per Language | 30 997             |
| Total Unique Instances        | 371 964            |
| Epochs per Level (L)          | 1                  |
| Instances (L0)                | 371 964            |
| Instances (L1)                | 185 982            |
| Instances (L2)                | 61 994             |
| Instances (L3)                | 30 997             |
| Total Seen Instances          | 650 937            |
| Real Total Instances          | 1 487 856          |
| Checkpoints                   | Every 500 batches  |
| Optimizer                     | Adafactor          |
| Scheduler                     | Linear             |
| Learning Rate                 | 5e-5               |
| Base Model                    | google/mt5-large   |
| Base Model Parameters         | 1.2B               |
| LoRA Parameters               | 293M               |
| LoRA Rank                     | 256                |
| LoRA Alpha                    | 256                |
| LoRA Dropout                  | 0.05               |
| LoRA Scailing                 | Rank-Stabilized    |
| LoRA Targets                  | All linear layer   |
| Quantization                  | BnB 4-bit          |

Table 5: Hyper Parameters of the HQL training experiments.

## C Other Metrics

### C.1 LDC2020T07

| Model      | DEU         | ENG         | SPA         | ITA         |
|------------|-------------|-------------|-------------|-------------|
| Ribeiro    | 49.4        | —           | 57.2        | 54.0        |
| Martinez   | <b>55.8</b> | <b>73.4</b> | <b>64.0</b> | <b>60.7</b> |
| MonoQL     | 45.4        | 71.1        | 61.8        | 50.9        |
| MultiQL    | 47.7        | 69.7        | 60.1        | 54.7        |
| Gen&Trans* | 54.9        | 71.1        | 63.7        | 59.6        |
| DLHQL      | 49.0        | 70.5        | 62.3        | 56.9        |
| PTHQL      | 50.6        | 70.1        | 62.3        | 57.1        |

Table 6: ChrF++ score on LDC2020T07 test data. \*English Gen&Trans is simply the result of MonoQL.

| Model      | DEU         | ENG         | SPA         | ITA         |
|------------|-------------|-------------|-------------|-------------|
| MonoQL     | 60.7        | 78.1        | 68.1        | 63.1        |
| MultiQL    | 57.7        | 77.6        | 66.6        | 65.9        |
| Gen&Trans* | <b>69.4</b> | 78.1        | <b>71.9</b> | <b>73.4</b> |
| DLHQL      | 62.3        | 78.9        | 71.3        | 71.0        |
| PTHQL      | 63.7        | <b>79.2</b> | 70.7        | 71.4        |

Table 7: BLEURT-20 score on LDC2020T07 test data. \*English Gen&Trans is simply the result of MonoQL.

### C.2 FLORES-200

| Model      | DEU         | LTZ         | ENG         | TPI         | NLD         | LIM         | SPA         | AST         | ITA         | SCN         | FRA         | HAT         |
|------------|-------------|-------------|-------------|-------------|-------------|-------------|-------------|-------------|-------------|-------------|-------------|-------------|
| MonoQL     | 39.2        | 37.1        | 58.5        | <b>38.4</b> | 36.8        | 30.8        | 37.1        | 34.3        | 37.0        | 32.5        | 42.2        | 37.6        |
| MultiQL    | 39.8        | 37.0        | 60.7        | 36.6        | 38.4        | 30.2        | 39.1        | 32.8        | 37.9        | 32.8        | 42.3        | 37.8        |
| Gen&Trans* | <b>44.0</b> | <b>39.5</b> | 58.5        | 35.0        | <b>41.8</b> | 31.9        | <b>41.3</b> | <b>47.4</b> | <b>42.3</b> | 30.5        | <b>49.2</b> | 39.5        |
| DLHQL      | 42.7        | 39.1        | <b>64.4</b> | 35.7        | 40.8        | <b>32.2</b> | <b>41.3</b> | 37.0        | 41.0        | <b>35.9</b> | 47.1        | <b>39.9</b> |
| PTHQL      | 43.1        | 39.4        | 64.4        | 35.7        | 41.5        | 32.0        | 40.9        | 37.6        | 40.6        | 35.7        | 47.6        | <b>39.7</b> |

Table 8: ChrF++ score on our sub set of FLORES-200 test data. \*English Gen&Trans is simply the result of MonoQL.

| Model     | DEU         | LTZ         | ENG         | TPI†        | NLD         | LIM†        | SPA         | AST†        | ITA         | SCN†        | FRA         | HAT         |
|-----------|-------------|-------------|-------------|-------------|-------------|-------------|-------------|-------------|-------------|-------------|-------------|-------------|
| MonoQL    | 57.8        | 34.9        | 68.5        | 59.3        | 63.2        | 33.7        | 47.5        | 28.9        | 50.4        | 16.4        | 40.3        | 45.7        |
| MultiQL   | 52.4        | 36.0        | 70.8        | 60.0        | 62.2        | 34.6        | 51.8        | 30.1        | 51.6        | 17.7        | 40.5        | 45.8        |
| Gen&Trans | <b>64.9</b> | <b>43.2</b> | 68.5*       | 59.7        | <b>64.7</b> | 37.6        | <b>59.3</b> | <b>38.2</b> | <b>63.2</b> | 21.8        | <b>56.8</b> | 49.6        |
| DLHQL     | 61.2        | 42.0        | <b>74.5</b> | <b>60.6</b> | 55.5        | 37.6        | 58.5        | 37.4        | 60.7        | <b>22.3</b> | 53.3        | 51.4        |
| PTHQL     | 61.4        | 42.2        | 74.3        | 59.9        | 53.5        | <b>38.0</b> | 58.8        | 38.1        | 61.1        | 22.2        | 54.3        | <b>51.4</b> |

Table 9: BLEURT-20 score on our sub set of FLORES-200 test data. \*English Gen&Trans is simply the result of MonoQL. †Languages not included in BLEURT pretraining.

## D Statistical Significance

For BLEU and ChrF++ which are corpus level metrics we performed paired bootstrap resampling (Koehn, 2004) to evaluate the statistical significance of the different models. We used our proposed PTHQL as the baseline for the pairwise comparison. For BLEURT, which is a sentence level metric, we used the Wilcoxon signed-rank test (Wilcoxon, 1945), since the scores of the test set do not follow a normal distribution.

### D.1 LDC2020T07

| Model     | DEU         | ENG         | SPA         | ITA         |
|-----------|-------------|-------------|-------------|-------------|
| MonoQL    | <b>0.00</b> | <b>0.00</b> | <b>0.01</b> | <b>0.00</b> |
| MultiQL   | <b>0.00</b> | 0.10        | <b>0.00</b> | <b>0.00</b> |
| Gen&Trans | <b>0.00</b> | <b>0.00</b> | <b>0.00</b> | <b>0.00</b> |
| DLHQL     | <b>0.00</b> | <b>0.02</b> | 0.20        | <b>0.05</b> |

Table 10: P-value of the paired bootstrap resampling on the BLEU score on LDC2020T07 test data when compared to PTHQL. On bold the cases where  $p \leq 0.05$ .

| Model     | DEU         | ENG         | SPA         | ITA         |
|-----------|-------------|-------------|-------------|-------------|
| MonoQL    | <b>0.00</b> | <b>0.02</b> | 0.08        | <b>0.00</b> |
| MultiQL   | <b>0.00</b> | <b>0.05</b> | <b>0.00</b> | <b>0.00</b> |
| Gen&Trans | <b>0.00</b> | <b>0.02</b> | <b>0.00</b> | <b>0.00</b> |
| DLHQL     | <b>0.00</b> | <b>0.04</b> | 0.36        | 0.11        |

Table 11: P-value of the paired bootstrap resampling on the ChrF++ score on LDC2020T07 test data when compared to PTHQL. On bold the cases where  $p \leq 0.05$ .

| Model     | DEU         | ENG         | SPA         | ITA         |
|-----------|-------------|-------------|-------------|-------------|
| MonoQL    | <b>0.00</b> | <b>0.01</b> | <b>0.00</b> | <b>0.00</b> |
| MultiQL   | <b>0.00</b> | <b>0.00</b> | <b>0.00</b> | <b>0.00</b> |
| Gen&Trans | <b>0.00</b> | <b>0.01</b> | <b>0.01</b> | <b>0.00</b> |
| DLHQL     | <b>0.00</b> | 0.58        | 0.19        | 0.31        |

Table 12: P-value of the paired bootstrap resampling on the BLEURT-20 score on AMR3.0 test data when compared to PTHQL. On bold the cases where  $p \leq 0.05$ .

### D.2 FLORES-200

| Model     | DEU         | LIT         | ENG         | TPI         | NLD         | LIM         | SPA         | AST         | ITA         | SCN         | FRA         | HAT         |
|-----------|-------------|-------------|-------------|-------------|-------------|-------------|-------------|-------------|-------------|-------------|-------------|-------------|
| MonoQL    | <b>0.00</b> | <b>0.00</b> | <b>0.00</b> | <b>0.00</b> | <b>0.00</b> | 0.12        | <b>0.00</b> | <b>0.00</b> | <b>0.00</b> | <b>0.00</b> | <b>0.00</b> | <b>0.00</b> |
| MultiQL   | <b>0.00</b> | <b>0.00</b> | <b>0.00</b> | 0.07        | <b>0.00</b> |
| Gen&Trans | <b>0.01</b> | <b>0.05</b> | <b>0.00</b> | 0.08        | 0.12        | 0.20        | <b>0.05</b> | 0.28        | <b>0.03</b> | <b>0.00</b> | <b>0.00</b> | <b>0.02</b> |
| DLHQL     | <b>0.03</b> | <b>0.04</b> | 0.17        | 0.25        | 0.27        | 0.34        | 0.08        | 0.23        | 0.38        | 0.16        | 0.20        | 0.22        |

Table 13: P-value of the paired bootstrap resampling on the BLEU score on our sub set of FLORES-200 test data when compared to PTHQL. On bold the cases where  $p \leq 0.05$ .

| Model     | DEU         | LTZ         | ENG         | TPI         | NLD         | LIM         | SPA         | AST         | ITA         | SCN         | FRA         | HAT         |
|-----------|-------------|-------------|-------------|-------------|-------------|-------------|-------------|-------------|-------------|-------------|-------------|-------------|
| MonoQL    | <b>0.00</b> |
| MultiQL   | <b>0.00</b> | <b>0.00</b> | <b>0.00</b> | <b>0.01</b> | <b>0.00</b> |
| Gen&Trans | <b>0.03</b> | 0.29        | <b>0.00</b> | 0.07        | 0.21        | 0.28        | 0.13        | 0.34        | <b>0.00</b> | <b>0.00</b> | <b>0.00</b> | 0.25        |
| DLHQL     | 0.06        | 0.13        | 0.33        | 0.41        | <b>0.01</b> | 0.18        | <b>0.04</b> | 0.10        | 0.09        | 0.15        | 0.06        | 0.18        |

Table 14: P-value of the paired bootstrap resampling on the ChrF++ score on our sub set of FLORES-200 test data when compared to PTHQL. On bold the cases where  $p \leq 0.05$ .

| Model     | DEU         | LTZ         | ENG         | TPI  | NLD         | LIM         | SPA         | AST         | ITA         | SCN         | FRA         | HAT         |
|-----------|-------------|-------------|-------------|------|-------------|-------------|-------------|-------------|-------------|-------------|-------------|-------------|
| MonoQL    | <b>0.00</b> | <b>0.00</b> | <b>0.00</b> | 0.17 | <b>0.00</b> |
| MultiQL   | <b>0.00</b> | <b>0.00</b> | <b>0.00</b> | 0.30 | <b>0.00</b> |
| Gen&Trans | <b>0.00</b> | 0.19        | <b>0.00</b> | 0.25 | <b>0.01</b> | 0.17        | 0.78        | 0.95        | <b>0.00</b> | 0.51        | <b>0.00</b> | <b>0.00</b> |
| DLHQL     | 0.44        | 0.60        | 0.16        | 0.12 | <b>0.01</b> | 0.31        | 0.28        | 0.22        | 0.44        | 0.37        | <b>0.04</b> | 0.31        |

Table 15: P-value of the paired bootstrap resampling on the BLEURT-20 score on our sub set of FLORES-200 test data when compared to PTHQL. On bold the cases where  $p \leq 0.05$ .
